# Supplementary material
Source: PubMed Central journal article supplement (PMC8201890)
Supplement: pnas.2101668118.sapp.pdf [file pnas.2101668118.sapp.pdf]

**A**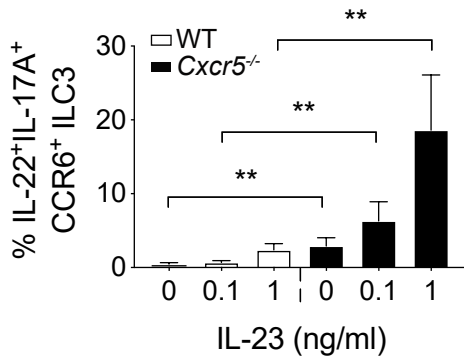**B**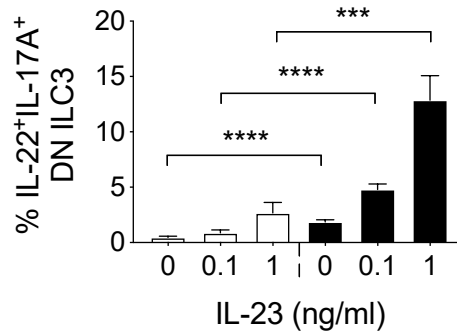

**SI Appendix, Fig. S1.** Frequencies of *Cxcr5*<sup>-/-</sup> small intestine ILC3 that simultaneously produce IL-17A and IL-22 upon stimulation. Frequencies of IL-22- and IL-17A-double producing (A) LTi-like cells and (B) DN ILC3 after ex-vivo stimulation for 3 h with the indicated doses of IL-23 (n=4). Bar graphs show mean ± SEM. \*\* P<0.01, \*\*\* P<0.001 and \*\*\*\* P<0.0001 (unpaired Student's t-test). Data shown are representative of 3 independent experiments.

**A**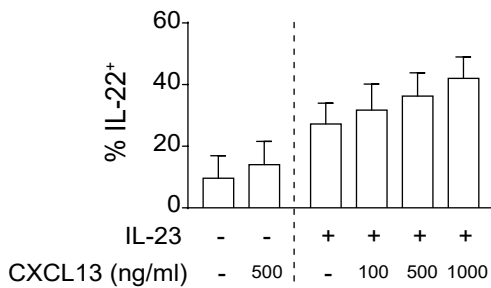**B**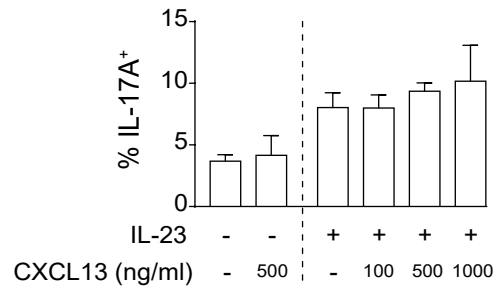

**SI Appendix, Fig. S2.** CXCL13 does not directly suppress LTi-like cell cytokine production. Frequencies of (A) IL-22- and (B) IL-17A-producing small intestine LTi-like cells after ex-vivo stimulation with 1 ng/ml IL-23 in the presence of varying amounts of CXCL13, as indicated (n=3). Stimulations were carried out for 3 h. Bar graphs show mean ± SEM. Data shown are representative of 2 independent experiments.

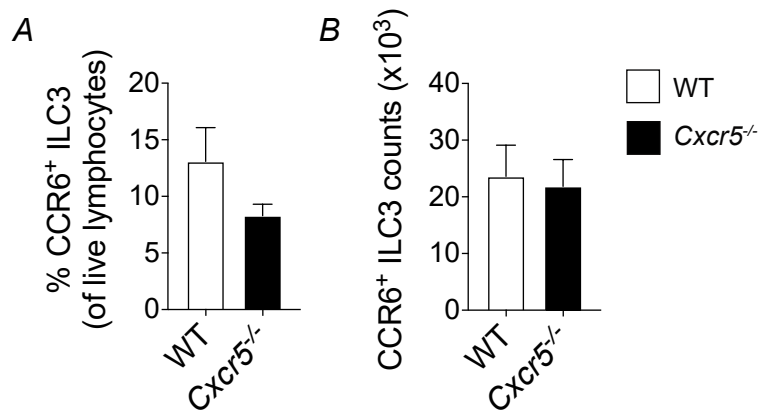

**SI Appendix, Fig. S3.** Abundance of CCR6<sup>+</sup> ILC3 in small intestines of *Cxcr5*<sup>-/-</sup> and WT neonates. (A) Frequencies and (B) absolute numbers of CCR6<sup>+</sup> ILC3 in small intestines of *Cxcr5*<sup>-/-</sup> and WT control mice at postnatal day 0 (n=4). Bar graphs show mean  $\pm$  SEM.

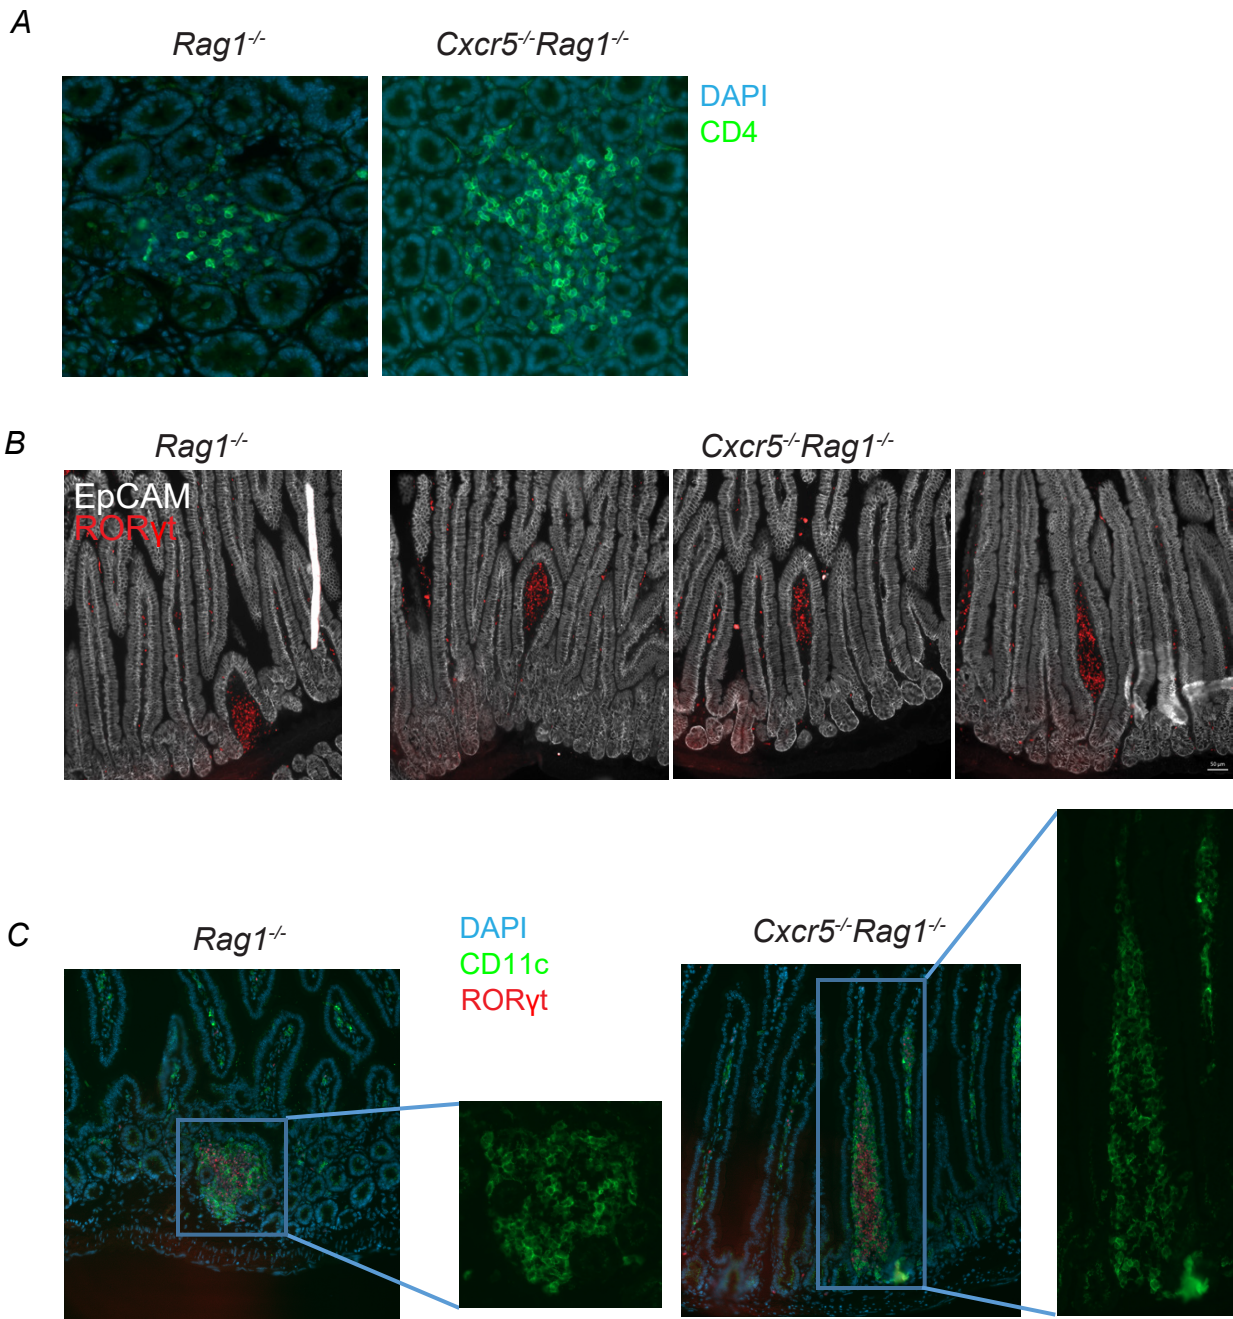

**SI Appendix, Fig. S4.** Characterization of ileal SILT in *Cxcr5*<sup>-/-</sup>*Rag1*<sup>-/-</sup> small intestines. (A) Representative images of crypt-level CD4<sup>+</sup> LTi-like cell aggregates in the distal small intestines of *Cxcr5*<sup>-/-</sup>*Rag1*<sup>-/-</sup> and *Rag1*<sup>-/-</sup> control mice. (B) Representative images of villus RORγt<sup>+</sup> ILC3 aggregates in the proximal intestines of *Cxcr5*<sup>-/-</sup>*Rag1*<sup>-/-</sup> and *Rag1*<sup>-/-</sup> control mice. (C) Representative images of CD11c<sup>+</sup> DCs in the proximal small intestines of *Cxcr5*<sup>-/-</sup>*Rag1*<sup>-/-</sup> and *Rag1*<sup>-/-</sup> control mice. Insets from boxed areas show CD11c staining only. Tissue sections were stained with DAPI for nuclei labeling or EpCAM for epithelial cells visualization as indicated.

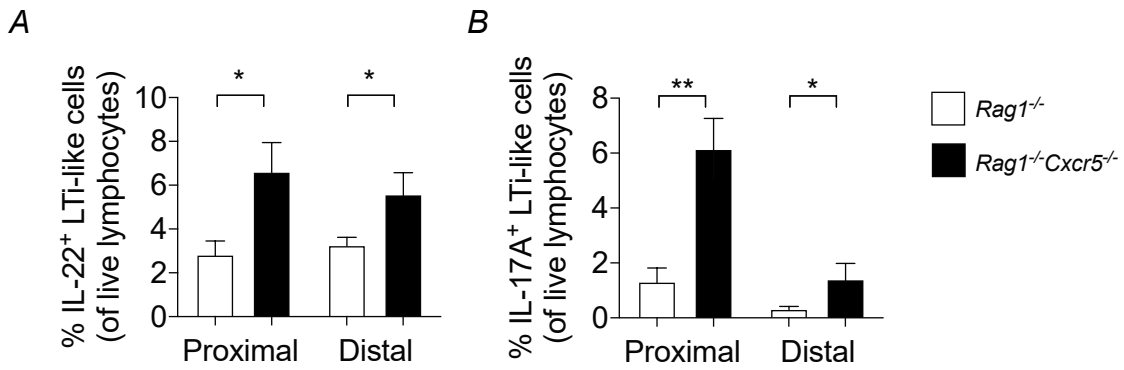

**SI Appendix, Fig. S5.** Abundance of cytokine-producing LTI-like cells as a percentage of all live lymphocytes in proximal and distal areas of *Cxcr5*<sup>-/-</sup>*Rag1*<sup>-/-</sup> and *Rag1*<sup>-/-</sup> small intestines. (A) IL-22- and (B) IL-17A-producing LTI-like cells expressed as a frequency of all small intestine live lymphocytes. Bar graphs show mean ± SD. \* P<0.05 and \*\* P<0.01. Data shown are representative of 2 independent experiments.

A

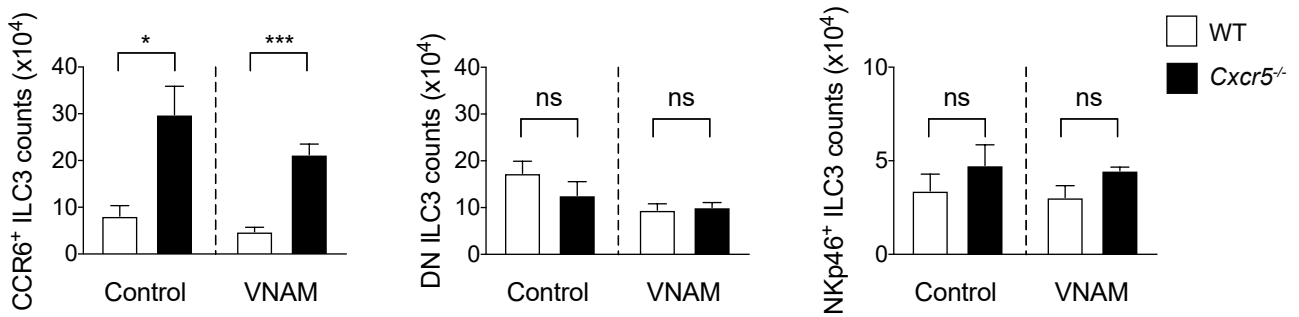

B

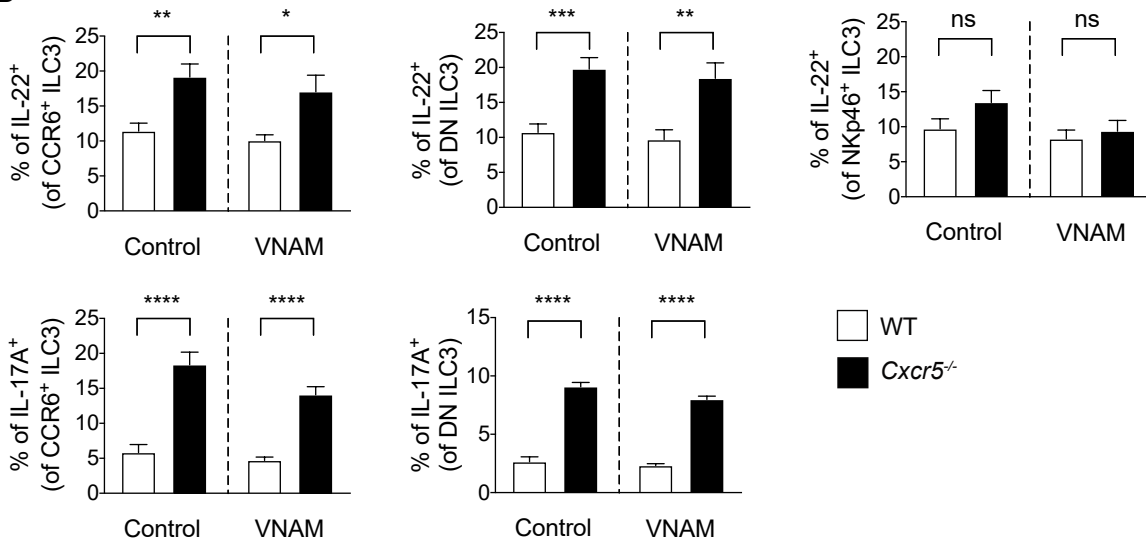

C

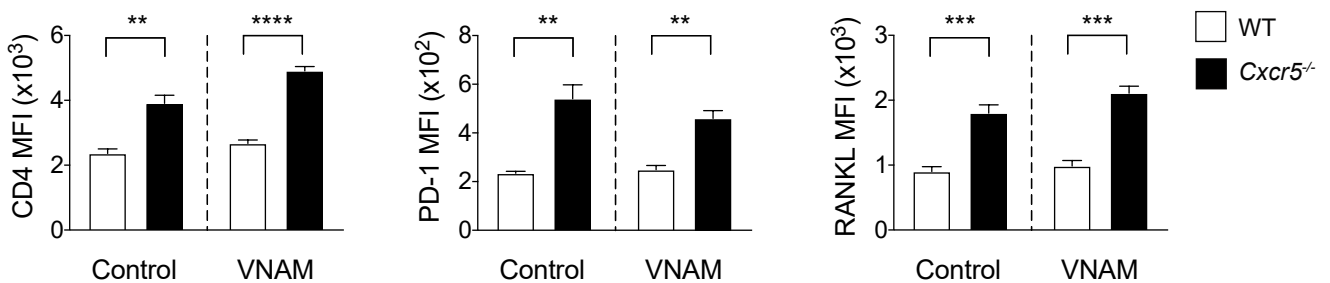

**SI Appendix, Fig. S6.** Heightened LTi-like cell activity in *Cxcr5*<sup>-/-</sup> mice does not require microbio-ta-derived signals. (A) Total cell counts of small intestine LTi-like, DN and NKp46<sup>+</sup> ILC3 in *Cxcr5*<sup>-/-</sup> and WT mice that were administered VNAM or control drinking water for 4 weeks. (B) Frequencies of IL-22- and IL-17A-producing LTi-like, DN and NKp46<sup>+</sup> ILC3 from VNAM-treated or control mice after *ex vivo* stimulation with 1 ng/mL of IL-23. Stimulations were carried out for 3 h. (C) CD4, PD-1 and RANKL cell surface expression by LTi-like cells isolated from control or VNAM-treated *Cxcr5*<sup>-/-</sup> and WT mice. Bar graphs show mean  $\pm$  SEM. \*  $P < 0.05$ , \*\*  $P < 0.01$ , \*\*\*  $P < 0.001$  and \*\*\*\*  $P < 0.0001$ . Data from A and C are representative of 2 independent experiments (n=3-4). Data in B were pooled from 2 independent experiments (n=7-8).
